# Supplementary material
Source: Springer Nature journal article supplement (https://www.springermedizin.de/resource/supplementary/12889_2013_5686_MOESM2_ESM.pdf/9495298)
Supplement: MOESM2 [file 9495298]

## Appendix 2 : Food insufficiency questions used in previous French studies

### INCA 2 Tool

Which of the following statements best describes the present situation in your household?

- 1) We always have enough to eat and the kinds of food we want.
- 2) **We have enough to eat but not always the kinds of food we want.**
- 3) **Sometimes, we don't have enough to eat.**
- 4) **Often, we don't have enough to eat.**

Answers 2, 3 and 4 were considered if the answer to the following question was "Yes":

**Do you think you don't have the kind of food you want to eat because**

**[you have an insufficient or irregular inflow of cash and therefore have to cut back on food spending]?**

} Food insufficiency

### BSN Tool

Which of the following statements best describes the present situation in your household?

- 1) We always have enough to eat and the kinds of food we want.
- 2) **We have enough to eat but not always the kinds of food we want.** → Qualitative food insufficiency
- 3) **Sometimes, we don't have enough to eat.**
- 4) **Often, we don't have enough to eat.**

} Quantitative food insufficiency
